# Supplementary material for: Robustness of Clonogenic Assays as a Biomarker for Cancer Cell Radiosensitivity
Source: Int J Mol Sci. 2019 Aug 25;20(17):4148. doi: 10.3390/ijms20174148 (PMC6747107; doi:10.3390/ijms20174148)
Supplement: Supplementary file 1 [file ijms-20-04148-s001.xlsx]

## Sheet: SD1
Supplementary Data 1: Clonogenic assay data acquired from the literatures.
Cell Line	PMID	Data Source	Timing of Cell Seeding	Radiation Type	Dose Rate (Gy/min)	SF2	SF4	SF6	SF8	D10	D50	Dbar
H1299	12409262	Fig. 6B	after irradiation	γ-rays	3.7	0.8	0.46	0.16	NA	6.73618	3.71812	3.89029
H1299	14617796	Fig. 6	after irradiation	γ-rays	3.5	0.64	0.3	0.1	NA	6.00248	2.75557	3.08745
H1299	16414373	Fig. 4	after irradiation	γ-rays	NA	NA	NA	0.1	NA	NA	NA	NA
H1299	17018617	Fig. 1	before irradiation	γ-rays	NA	0.82	0.64	0.34	0.14	8.69513	4.76551	4.38616
H1299	17084559	Fig. 5A	after irradiation	X-rays	NA	NA	NA	0.1	NA	NA	NA	NA
H1299	17143500	Fig. 3B	before irradiation	γ-rays	3.81	0.79	0.52	NA	NA	NA	NA	NA
H1299	17431403	Fig. 2	after irradiation	γ-rays	3.5	0.64	0.34	NA	NA	NA	NA	NA
H1299	17487369	Fig. 1B	before irradiation	X-rays	2	0.8	0.46	0.24	NA	7.88997	3.83961	3.69053
H1299	18253126	Fig. 3C	before irradiation	γ-rays	0.83	0.84	0.6	0.46	0.2	9.86034	5.16217	2.63055
H1299	18281562	Fig. 1B	after irradiation	γ-rays	4.5	0.56	0.24	0.07	NA	5.47146	2.35108	2.50844
H1299	18456354	Fig. 2B	before irradiation	γ-rays	NA	0.5	0.16	0.12	0.03	5.70042	1.87188	2.53737
H1299	19745602	Fig. 1A	before irradiation	X-rays	NA	0.8	NA	NA	NA	NA	NA	NA
H1299	20628392	Fig. 2	after irradiation	X-rays	0.85	0.74	0.48	0.22	NA	7.68355	3.75187	4.13619
H1299	21737634	Fig. 2C	after irradiation	γ-rays	3.7	0.52	0.14	0.03	NA	4.55152	1.93913	1.91584
H1299	21903282	Fig. 4A	after irradiation	NA	NA	0.66	0.22	0.12	NA	6.26044	2.27349	2.8929
H1299	22524618	Fig. 1C	before irradiation	X-rays	NA	0.48	0.14	0.03	NA	4.513	1.8514	2.18931
H1299	22684019	Fig. 4A	before irradiation	γ-rays	3.2	0.8	0.4	0.1	NA	6.01442	3.4701	3.28781
H1299	22704525	Fig. 3C	before irradiation	X-rays	2	0.8	0.54	0.3	0.14	8.7569	4.28921	3.56449
H1299	22795803	Fig. 2B	after irradiation	γ-rays	3.47	0.7	0.4	0.16	0.05	6.87297	3.2951	1.91551
H1299	23079779	Fig. 4	before irradiation	X-rays	NA	0.66	0.42	NA	0.03	NA	NA	NA
H1299	23900080	Fig. 1F	after irradiation	γ-rays	3.81	0.68	0.28	NA	NA	NA	NA	NA
H1299	23902763	Fig. 2C	before irradiation	γ-rays	0.18	0.76	NA	NA	NA	NA	NA	NA
H1299	24347608	Fig. 1A	NA	X-rays	3	0.5	0.16	0.07	NA	5.21683	1.71809	2.32299
H1299	24418519	Fig. 3C	after irradiation	X-rays	NA	0.2	0.12	0.03	0.02	3.69676	0.984061	1.36192
H1299	24650056	Fig. 1D	after irradiation	X-rays	2	0.74	0.36	0.16	0.04	6.66768	3.30123	2.99219
H1299	24750999	Fig. 1A	before irradiation	γ-rays	3.2	0.8	0.4	0.14	NA	6.49572	3.49506	3.71614
H1299	25318890	Fig. 1A	after irradiation	X-rays	3	0.76	0.44	0.12	0.02	6.22841	3.57634	2.09703
H1299	25714019	Fig. 1F	NA	γ-rays	3.47	0.68	0.34	0.1	0.03	6.1856	2.87388	4.16299
H1299	25738799	Fig. 1B	after irradiation	γ-rays	NA	0.62	0.32	0.18	0.04	6.65614	3.04777	3.4296
H1299	25742788	Fig. 8B	before irradiation	X-rays	NA	0.56	0.36	0.1	NA	6.08265	2.81788	3.26956
H1299	25835621	Fig. 4A	before irradiation	X-rays	NA	NA	0.64	0.4	NA	NA	NA	NA
H1299	26221237	Fig. 6B	before irradiation	X-rays	1.95	0.76	0.44	0.12	0.02	6.22841	3.57634	2.76306
H1299	26238156	Fig. 1B	NA	X-rays	1.15	0.9	0.76	0.5	0.3	11.0742	6.05612	6.47552
H1299	26266801	Fig. 1B	before irradiation	γ-rays	NA	0.9	0.64	0.36	0.1	8.08992	4.88557	4.31093
H1299	26269117	Fig. 2C	before irradiation	X-rays	0.4	0.9	0.24	0.14	0.12	8.15219	2.24742	3.13526
H1299	26393423	Fig. 6	after irradiation	X-rays	0.63	0.86	NA	NA	NA	NA	NA	NA
H1299	26542881	Fig. 4	before irradiation	X-rays	3	0.72	0.5	0.26	0.08	7.70076	3.97967	4.30801
H1299	26553138	Fig. 2C	before irradiation	X-rays	NA	0.76	0.48	0.36	NA	12.369	4.0875	5.48292
H1299	27014877	Fig. 4B	after irradiation	X-rays	NA	0.7	0.54	0.38	0.2	10.4288	4.37083	5.09559
H1299	27178816	Fig. 2C	before irradiation	X-rays	1.16	0.8	0.4	0.38	0.14	9.11646	4.03179	4.62617
A549	1329908	Fig. 4	after irradiation	X-rays	0.45	0.8	0.52	NA	0.16	NA	NA	NA
A549	2522917	Fig. 2	after irradiation	X-rays	2.4	NA	NA	0.07	NA	NA	NA	NA
A549	3182336	Fig. 1	after irradiation	X-rays	5	0.84	0.58	0.3	0.09	7.89457	4.50331	4.40583
A549	3797633	Fig. 2	before irradiation	X-rays	20	NA	0.055	NA	NA	NA	NA	NA
A549	6469743	Fig. 1	before irradiation	X-rays	NA	0.8	0.32	0.12	0.03	6.30283	3.10442	3.38412
A549	7911794	Fig. 2	after irradiation	X-rays	1.5	NA	NA	0.03	NA	NA	NA	NA
A549	9155536	Fig. 1	before irradiation	X-rays	NA	NA	0.2	NA	NA	NA	NA	NA
A549	9288891	Fig. 7A	after irradiation	γ-rays	NA	0.74	0.36	0.12	0.02	6.14205	3.32531	3.52806
A549	9652909	Fig. 1	before irradiation	γ-rays	1.63	0.52	0.2	0.07	0.02	5.38106	1.99308	2.49956
A549	9719129	manuscript	before irradiation	X-rays	0.98	0.6	NA	NA	NA	NA	NA	NA
A549	9766667	Fig. 4	before irradiation	γ-rays	6.4	NA	NA	NA	0.08	NA	NA	NA
A549	9860291	Fig. 3C	before irradiation	γ-rays	0.45	0.62	0.26	0.12	NA	6.32	2.42	2.58184
A549	10030269	Fig. 1	before irradiation	X-rays	0.8	0.68	0.42	0.2	NA	7.62	3.32	3.84164
A549	10363567	Fig. 2A	before irradiation	X-rays	0.8	0.68	0.42	0.2	NA	7.62	3.32	3.84164
A549	10646858	Fig. 3D	before irradiation	γ-rays	1.5	0.65	0.21	NA	NA	NA	NA	NA
A549	11234886	Fig. 3	before irradiation	γ-rays	1	0.8	NA	NA	0.04	NA	NA	NA
A549	11240258	Fig. 1	before irradiation	X-rays	4	0.78	0.28	0.12	0.03	6.23446	2.90846	3.23891
A549	11414196	Fig. 5A	before irradiation	X-rays	NA	0.9	0.66	0.32	0.16	8.88798	4.86315	3.46877
A549	11704327	Fig. 7	before irradiation	γ-rays	0.805	0.9	0.26	0.06	0.01	5.52609	2.90771	3.10529
A549	12651211	Fig. 1	before irradiation	γ-rays	NA	0.64	0.34	0.1	0.03	6.16693	2.8132	3.16315
A549	12655440	Fig. 1	before irradiation	γ-rays	NA	0.78	0.46	0.26	0.1	8.03855	3.87986	4.30229
A549	12740661	Fig. 1	before irradiation	X-rays	1	0.56	0.22	0.04	NA	4.97	2.42	2.65191
A549	12778079	Fig. 1	before irradiation	X-rays	1	0.6	0.2	0.03	NA	4.8	2.47	2.66704
A549	14525974	Fig. 9B	before irradiation	γ-rays	1.05	0.74	0.5	0.3	NA	9.4	4.23	4.65015
A549	14676811	Fig. 2	before irradiation	γ-rays	NA	0.66	0.38	0.18	0.1	7.89955	2.9053	3.66748
A549	14726672	Fig. 1B	after irradiation	X-rays	1	0.94	0.42	0.19	0.04	6.83706	3.89593	3.79557
A549	14991204	Fig. 1	before irradiation	X-rays	1	0.62	0.32	0.11	0.04	6.35264	2.63928	3.11117
A549	14991746	Fig. 1	before irradiation	γ-rays	NA	0.78	0.48	0.32	0.1	8.1381	4.1923	4.55412
A549	15100409	Fig. 2A	before irradiation	γ-rays	NA	0.7	0.48	0.24	0.1	8.0258	3.7149	4.18681
A549	15194048	Fig. 5	before irradiation	γ-rays	3.4	0.64	0.32	0.1	NA	6.01815	2.85172	3.1522
A549	15246566	Fig. 1A	before irradiation	X-rays	2	0.7	0.3	0.08	0.03	6.00069	2.58051	2.98313
A549	15304968	Fig. 7A	before irradiation	X-rays	3	0.62	0.19	0.06	0.01	5.16598	2.23727	2.61217
A549	15756525	Fig. 1A	before irradiation	X-rays	NA	0.6	0.23	0.02	NA	4.69774	2.70441	2.5917
A549	15966762	Fig. 1	before irradiation	γ-rays	1.55	0.64	0.42	0.2	NA	7.778	3.19948	3.80618
A549	16024112	Fig. 1	before irradiation	X-rays	3	0.79	0.26	0.07	NA	5.52942	2.93534	3.12872
A549	16230415	Fig. 2A	before irradiation	γ-rays	10.7	NA	NA	0.06	NA	NA	NA	NA
A549	16238441	Fig. 1	before irradiation	γ-rays	NA	0.82	0.6	0.32	0.18	9.40347	4.58586	5.06912
A549	16414373	Fig. 4A	after irradiation	γ-rays	3.3	NA	NA	0.15	NA	NA	NA	NA
A549	16751067	Fig. 1B	before irradiation	X-rays	1.1	0.6	0.52	NA	NA	NA	NA	NA
A549	16818713	Fig. 1	after irradiation	X-rays	4	0.84	0.52	0.26	NA	7.92889	4.19802	4.51379
A549	16914589	Fig. 5	before irradiation	γ-rays	NA	NA	NA	0.09	NA	NA	NA	NA
A549	16928817	Fig. 3C	after irradiation	γ-rays	4.5	0.62	0.24	0.06	NA	5.33663	2.54298	2.80267
A549	16957930	Fig. 2	before irradiation	X-rays	NA	0.76	0.29	0.11	0.03	6.10593	2.93931	3.19813
A549	17016621	Fig. 1	before irradiation	X-rays	1	0.7	0.33	0.12	0.05	6.54051	2.81992	3.25641
A549	17018617	Fig. 1A	before irradiation	γ-rays	NA	0.8	0.5	0.25	0.1	7.99558	4.00796	5.12433
A549	17487369	Fig. 1B	before irradiation	X-rays	2	0.74	0.4	0.16	NA	6.82586	3.38381	4.2424
A549	17560675	Fig. 1A	after irradiation	X-rays	1	0.66	0.44	0.18	0.05	6.96037	3.47486	3.78372
A549	17575114	Fig. 3E	before irradiation	γ-rays	1.5	0.7	NA	NA	NA	NA	NA	NA
A549	17671714	Fig. 3	before irradiation	γ-rays	3.7	0.6	0.42	0.1	NA	6.09265	3.1514	3.37912
A549	17714814	Fig. 1A	before irradiation	X-rays	3	0.74	0.35	0.09	NA	5.87663	3.20144	3.39317
A549	17786182	Fig. 1C	before irradiation	γ-rays	0.9	0.82	0.52	0.19	0.07	7.36476	3.90233	4.18659
A549	17875720	Fig. 2D	before irradiation	γ-rays	4	0.44	0.12	0.03	NA	4.36198	1.62134	2.02598
A549	17895594	Fig. 4B	before irradiation	X-rays	3	0.8	0.52	0.26	0.09	7.84586	4.13869	4.46057
A549	17996386	Fig. 1A	before irradiation	X-rays	3	0.58	0.21	NA	NA	NA	NA	NA
A549	18019404	Fig. 1A	before irradiation	γ-rays	NA	0.82	0.28	NA	0.02	NA	NA	NA
A549	18281562	Fig. 1A	after irradiation	γ-rays	4.5	0.53	0.2	0.06	NA	5.21391	2.10172	2.71443
A549	18551247	Fig. 1	before irradiation	X-rays	0.93	0.56	0.215	0.08	NA	5.58964	2.18659	2.63828
A549	18644989	Fig. 1B	after irradiation	X-rays	NA	0.58	0.09	NA	NA	NA	NA	NA
A549	18645008	Fig. 1C	before irradiation	γ-rays	1.7	0.64	0.28	0.18	NA	7.76673	2.43608	3.3961
A549	19224174	Fig. 1	after irradiation	γ-rays	0.3	0.66	NA	NA	NA	NA	NA	NA
A549	19228735	Fig. 2	after irradiation	X-rays	0.7	0.42	NA	NA	NA	NA	NA	NA
A549	19360361	Fig. 1	before irradiation	γ-rays	3.2	0.34	0.12	0.05	0.02	4.43593	1.2666	1.79052
A549	19366835	Fig. 1A	before irradiation	X-rays	1.55	0.8	0.46	0.23	0.08	7.61817	3.84603	3.11354
A549	19432883	Fig. 2	before irradiation	X-rays	1.953	0.8	0.62	0.3	NA	8.48602	4.5343	4.89165
A549	19469013	Fig. 2	after irradiation	X-rays	0.93	0.56	NA	NA	NA	NA	NA	NA
A549	19540039	Fig. 7A	before irradiation	X-rays	NA	0.62	0.34	0.14	0.04	6.53154	2.91594	3.31772
A549	19773431	Fig. 6B	before irradiation	γ-rays	NA	0.66	0.46	0.34	0.18	10.3941	3.74594	4.73518
A549	20005451	Fig. 2C	before irradiation	X-rays	2.46	0.42	0.18	0.04	0.01	4.76768	1.76216	2.20975
A549	20079711	Fig. 2B	before irradiation	γ-rays	0.2	0.9	NA	NA	NA	NA	NA	NA
A549	20200474	Fig. 1B	before irradiation	γ-rays	4	NA	0.41	NA	NA	NA	NA	NA
A549	20347166	Fig. 6D	after irradiation	X-rays	1	0.54	0.1	NA	NA	NA	NA	NA
A549	20354451	Fig. 2	before irradiation	γ-rays	1.8	0.84	0.56	0.26	NA	7.87976	4.3013	4.60419
A549	20502461	Fig. 3	after irradiation	X-rays	2	0.64	NA	NA	0.02	NA	NA	NA
A549	20505264	Fig. 1A	before irradiation	X-rays	2.46	0.8	0.54	0.28	0.14	8.7241	4.19915	4.66687
A549	20587532	Fig. 2A	before irradiation	X-rays	2.46	0.66	0.38	0.16	0.05	6.7578	3.20136	3.54363
A549	20605584	Fig. 5	before irradiation	X-rays	2	0.96	0.9	0.7	0.48	13.4417	7.84292	7.20944
A549	20708854	Fig. 2A	after irradiation	γ-rays	4	0.7	0.35	0.18	0.08	7.36648	3.00957	3.59673
A549	20723210	Fig. 1C	before irradiation	X-rays	NA	0.56	0.3	0.16	0.1	7.91046	2.24601	3.16223
A549	20731837	Fig. 1A	before irradiation	γ-rays	NA	0.64	0.26	0.08	NA	5.66062	2.61142	2.26497
A549	20876746	Fig. 1D	after irradiation	γ-rays	NA	0.7	0.3	0.12	0.04	6.4106	2.75046	3.18928
A549	21216938	Fig. 1C	before irradiation	X-rays	2.64	0.66	0.18	0.07	NA	5.35384	2.21169	1.60537
A549	21258249	Fig. 1B	before irradiation	NA	NA	0.6	0.28	0.1	0.03	6.04041	2.51064	2.9548
A549	21325978	Fig. 2B	before irradiation	X-rays	0.9	0.38	0.12	0.04	NA	4.39297	1.39401	1.9323
A549	21361782	Fig. 1	before irradiation	X-rays	1	0.4	0.14	0.04	NA	4.55268	1.56266	2.05246
A549	21377279	Fig. 1A	before irradiation	X-rays	NA	0.66	0.38	0.2	0.06	7.1654	3.2812	3.70242
A549	21499433	Fig. 2	before irradiation	X-rays	1.24	0.74	0.44	0.1	0.02	6.14054	3.42051	3.50134
A549	21562407	Fig. 2A	before irradiation	γ-rays	0.86	0.44	0.18	0.1	0.02	5.44868	1.96154	2.504
A549	21609781	Fig. 1	after irradiation	γ-rays	3	0.58	NA	NA	NA	NA	NA	NA
A549	21621345	Fig. 1A	after irradiation	X-rays	NA	0.48	0.2	0.05	0.01	5.55033	1.83391	2.42802
A549	21676478	Fig. 2A	before irradiation	X-rays	2.46	0.64	0.24	0.09	0.02	5.74512	2.50798	2.87488
A549	21704411	Fig. 1A	before irradiation	X-rays	NA	0.4	0.12	NA	NA	NA	NA	NA
A549	21737634	Fig. 2B	after irradiation	γ-rays	3.7	0.46	0.16	0.03	NA	4.72261	1.83392	2.25346
A549	21785234	Fig. 2B	before irradiation	X-rays	NA	0.6	0.3	0.14	0.05	6.64878	2.5969	3.17004
A549	21798026	Fig. 2A	before irradiation	X-rays	NA	0.8	0.5	0.22	0.08	7.5981	3.92848	4.24907
A549	21822689	Fig. 1	after irradiation	X-rays	NA	0.44	0.16	0.04	NA	4.70138	1.78431	2.20242
A549	21825006	Fig. 1C	before irradiation	X-rays	NA	0.74	0.36	0.12	NA	6.27003	3.22401	3.46452
A549	21839752	Fig. 1	after irradiation	γ-rays	3	0.6	NA	NA	NA	NA	NA	NA
A549	21842425	Fig. 4	before irradiation	X-rays	2	0.82	0.62	0.36	0.03	6.98634	4.70174	3.12751
A549	21844013	Fig. 1A	after irradiation	γ-rays	0.805	0.53	NA	NA	NA	NA	NA	NA
A549	21909646	Fig. 1	before irradiation	X-rays	3	NA	0.22	NA	NA	NA	NA	NA
A549	21910584	Fig. 1A	before irradiation	γ-rays	0.81	0.74	0.58	0.36	0.22	10.6345	4.53141	5.2354
A549	21937165	Fig. 3	before irradiation	γ-rays	1	0.86	0.52	0.14	NA	6.46048	3.92858	4.17774
A549	21947247	Fig. 1B	before irradiation	X-rays	NA	0.54	NA	NA	NA	NA	NA	NA
A549	22001234	Fig. 1	after irradiation	γ-rays	3.5	0.6	NA	NA	NA	NA	NA	NA
A549	22019440	Fig. 4A	after irradiation	X-rays	0.06	0.6	0.46	0.18	0.09	7.60799	3.18928	3.76451
A549	22370645	Fig. 7D	after irradiation	NA	NA	0.34	0.12	0.03	NA	4.19657	1.39104	1.86935
A549	22417805	Fig. 3	before irradiation	γ-rays	9.1	0.84	0.54	0.34	NA	9.37717	4.50584	5.00496
A549	22429326	Fig. 1	before irradiation	X-rays	NA	0.9	0.62	0.32	0.14	8.62567	4.75122	5.06115
A549	22441439	Fig. 2	after irradiation	X-rays	2	0.68	NA	NA	0.04	NA	NA	NA
A549	22516777	Fig. 5	after irradiation	X-rays	1	0.32	0.08	NA	NA	NA	NA	NA
A549	22617250	Fig. 2	after irradiation	γ-rays	3.5	0.68	0.41	NA	NA	NA	NA	NA
A549	22658516	Fig. 1	after irradiation	X-rays	2	0.66	0.24	0.09	0.02	5.75718	2.5358	2.89421
A549	22679376	Fig. 6	before irradiation	X-rays	2	0.52	0.16	0.05	NA	4.92209	1.89364	2.31941
A549	22684019	Fig. 4B	before irradiation	γ-rays	3.2	0.8	0.56	0.1	NA	6.07072	3.84913	2.95451
A549	22704525	Fig. 3C	before irradiation	X-rays	2	0.72	0.4	0.14	0.05	6.80048	3.20507	4.73901
A549	22778546	Fig. 1	before irradiation	X-rays	NA	0.84	0.36	0.12	0.03	6.36474	3.3022	3.54065
A549	22795728	Fig. 3C,D	before irradiation	NA	NA	0.55	NA	NA	NA	NA	NA	NA
A549	22843362	Fig. 1B	after irradiation	X-rays	0.8	0.48	NA	NA	NA	NA	NA	NA
A549	22969859	Fig. 3	before irradiation	X-rays	NA	0.54	NA	NA	NA	NA	NA	NA
A549	23066444	Fig. 1A	after irradiation	X-rays	2	0.68	0.3	0.12	0.04	6.40241	2.72002	3.1698
A549	23073808	Fig. 1	before irradiation	X-rays	0.79	0.68	NA	NA	NA	NA	NA	NA
A549	23161119	Fig. 5	after irradiation	X-rays	2	0.76	0.4	0.14	0.04	6.63895	3.35645	3.6321
A549	23182391	Fig. 1A	before irradiation	γ-rays	0.5	0.8	0.46	0.2	0.07	7.37614	3.74364	4.06551
A549	23233807	Fig. 3	after irradiation	X-rays	2	0.82	0.42	0.19	0.08	7.50294	3.529	3.94355
A549	23254764	Fig. 2B	after irradiation	γ-rays	3.47	0.72	0.38	0.18	0.05	6.92707	3.36201	2.6613
A549	23349340	Fig. 1E	after irradiation	γ-rays	1	0.76	0.38	0.14	NA	6.52753	3.34206	3.59995
A549	23370278	Fig. 3B	after irradiation	γ-rays	0.4	0.54	0.3	NA	0.02	NA	NA	NA
A549	23381730	Fig. 6	before irradiation	X-rays	1	0.4	0.14	0.07	0.02	4.93719	1.5394	2.16272
A549	23403985	Fig. 4	before irradiation	X-rays	2.1	0.74	0.62	0.28	0.08	7.73082	4.40136	NA
A549	23492775	Fig. 4A	after irradiation	X-rays	NA	0.83	0.64	0.44	0.22	10.1454	5.23504	5.68257
A549	23540554	Fig. 1	before irradiation	X-rays	0.855	0.5	NA	NA	NA	NA	NA	NA
A549	23578064	Fig. 2	before irradiation	X-rays	2	0.9	0.66	0.32	0.16	8.88798	4.86315	5.23455
A549	23730419	Fig. 6	before irradiation	X-rays	2.67	0.65	0.18	0.09	NA	5.66017	2.09193	2.62927
A549	23777591	Fig. 2C	before irradiation	γ-rays	2.4	0.74	0.52	0.3	0.1	8.10887	4.18289	4.54152
A549	23842094	Fig. 1,2	before irradiation	X-rays	2	0.62	0.2	0.09	0.01	5.50216	2.47163	2.85085
A549	23875954	Fig. 2A	before irradiation	X-rays	2.5	0.64	0.14	0.03	NA	4.64167	2.1743	2.36342
A549	23891087	Fig. 1A	after irradiation	γ-rays	NA	NA	0.14	NA	0.05	NA	NA	NA
A549	23894523	Fig. 2A	after irradiation	X-rays	2.04	0.28	0.05	0.01	NA	3.24563	1.05144	1.43537
A549	23900080	Fig. 1F	after irradiation	γ-rays	3.8	0.7	0.46	NA	NA	NA	NA	NA
A549	23953412	Fig. 2	after irradiation	X-rays	3	0.7	0.42	0.22	NA	7.98051	3.38248	3.96514
A549	23976954	Fig. 1A	before irradiation	X-rays	3	0.7	0.5	0.14	0.09	7.51989	3.23547	3.76327
A549	24002026	Fig. 4A	after irradiation	γ-rays	2.8	0.25	NA	NA	NA	NA	NA	NA
A549	24012673	Fig. 2D	after irradiation	γ-rays	3.81	0.7	0.48	0.28	NA	9.31584	3.7254	4.47286
A549	24021650	Fig. 3A	before irradiation	X-rays	NA	0.66	0.36	0.14	0.05	6.74714	2.95609	3.39776
A549	24142735	Fig. 4	before irradiation	X-rays	0.79	0.54	NA	NA	NA	NA	NA	NA
A549	24192264	Fig. 2	before irradiation	X-rays	1	0.6	0.24	NA	NA	NA	NA	NA
A549	24269823	Fig. 2D	before irradiation	γ-rays	0.2	0.8	NA	NA	NA	NA	NA	NA
A549	24347608	Fig. 1A	before irradiation	X-rays	3	0.46	0.16	0.05	NA	4.86963	1.75155	2.23387
A549	24366006	Fig. 2	before irradiation	X-rays	4	0.7	NA	NA	0.06	NA	NA	NA
A549	24385472	Fig. 5A	before irradiation	X-rays	2.55	0.84	0.62	0.34	0.16	9.01604	4.7549	5.15155
A549	24389430	Fig. 1	after irradiation	γ-rays	NA	0.66	0.22	NA	0.04	NA	NA	NA
A549	24606853	Fig. 2D	before irradiation	γ-rays	1.69	0.51	0.21	0.13	0.05	6.23344	2.01464	2.76592
A549	24650056	Fig. 1C	before irradiation	X-rays	2	0.6	0.24	0.12	0.02	5.78059	2.77387	3.59864
A549	24659807	Suppl. Fig.	before irradiation	X-rays	1.1	0.6	0.24	0.05	NA	5.18621	2.5499	2.77949
A549	24746574	Fig. 2A	before irradiation	γ-rays	9.1	0.66	0.26	0.1	NA	5.95674	2.59108	2.97764
A549	24758615	Fig. 5C	before irradiation	γ-rays	2	NA	NA	NA	0.22	NA	NA	NA
A549	24857596	Fig. 2B	after irradiation	X-rays	1	0.62	0.24	NA	NA	NA	NA	NA
A549	24932256	Fig. 1B	before irradiation	X-rays	0.41	0.38	0.28	0.06	NA	5.32596	2.06362	2.51927
A549	24937370	Fig. 1A	before irradiation	γ-rays	NA	0.6	0.2	NA	NA	NA	NA	NA
A549	25041846	Fig. 1B	before irradiation	γ-rays	1	0.62	NA	NA	NA	NA	NA	NA
A549	25318890	Fig. 1A	before irradiation	X-rays	3	0.46	0.12	0.02	NA	4.25242	1.80064	3.42282
A549	25344917	Fig. 2B	after irradiation	γ-rays	2	0.64	NA	NA	NA	NA	NA	NA
A549	25442346	Fig. 4B	before irradiation	X-rays	0.36	0.84	0.7	NA	0.2	NA	NA	NA
A549	25544240	Fig. 2B	before irradiation	X-rays	NA	0.8	NA	NA	NA	NA	NA	NA
A549	25592111	Fig. 1A,B	before irradiation	X-rays	NA	0.48	0.21	NA	NA	NA	NA	NA
A549	25600060	Fig. 2A,B	before irradiation	X-rays	2.46	0.91	0.66	0.41	0.27	10.7603	5.40189	5.89514
A549	25609072	Fig. 1A	before irradiation	X-rays	2	0.66	0.38	0.22	0.08	7.61391	3.23942	3.78918
A549	25692226	Fig. 2	after irradiation	γ-rays	NA	0.7	0.4	0.1	NA	6.04349	3.29968	3.4956
A549	25714019	Fig. 1E	after irradiation	γ-rays	3.47	0.8	0.5	0.2	0.07	7.30648	3.88839	2.53527
A549	25742788	Fig. 8A	before irradiation	X-rays	0.5	0.64	0.32	0.14	NA	6.6747	2.76607	3.14556
A549	25755254	Fig. 1	before irradiation	X-rays	1.1	0.7	0.48	0.24	0.1	8.0258	3.7149	2.43728
A549	25796091	Fig. 4B	before irradiation	X-rays	4.2	0.8	0.52	0.22	NA	7.4747	4.01277	3.22838
A549	25887043	Fig. 1	before irradiation	X-rays	0.7	0.78	NA	NA	0.36	NA	NA	NA
A549	26033480	Fig. 1B	before irradiation	γ-rays	0.81	0.84	0.6	0.3	0.1	8.04185	4.5472	3.48447
A549	26089688	Fig. 3	after irradiation	X-rays	2	0.82	0.6	0.24	0.08	7.64373	4.31052	4.32127
A549	26147006	Fig. 1C	before irradiation	X-rays	0.341	0.9	0.58	0.38	0.14	8.73112	4.85297	5.06729
A549	26221237	Fig. 6A	before irradiation	X-rays	1.95	0.68	0.26	0.06	0.02	5.58848	2.38353	3.42282
A549	26246329	Fig. 4A	before irradiation	γ-rays	3.89	0.7	0.4	0.14	0.04	6.62349	3.26905	3.5667
A549	26247668	Fig. 1	before irradiation	X-rays	3	0.78	0.64	0.38	0.18	9.45308	4.8798	5.31056
A549	26266801	Fig. 1A	before irradiation	γ-rays	0.5	0.86	0.44	0.26	0.07	7.50257	4.02561	4.19588
A549	26318663	Fig. 3A	before irradiation	NA	NA	0.46	0.12	NA	NA	NA	NA	NA
A549	26320609	Fig. 1C	after irradiation	X-rays	1	0.36	0.08	0.02	NA	3.8172	1.28255	1.70763
A549	26393423	Fig. 6	before irradiation	X-rays	0.628	0.82	NA	NA	NA	NA	NA	NA
A549	26542881	Fig. 4	before irradiation	X-rays	3	0.68	0.38	0.2	0.05	8.00189	5.45001	3.73275
A549	26667181	Fig. 2B	before irradiation	γ-rays	0.29	NA	0.16	NA	NA	NA	NA	NA
A549	26712741	Fig. 4A	before irradiation	γ-rays	1	0.84	0.68	0.48	NA	12.274	5.80534	6.34891
A549	26722253	Fig. 2B	before irradiation	X-rays	2	0.62	NA	NA	NA	NA	NA	NA
A549	26740518	Fig. 5	before irradiation	X-rays	NA	0.64	0.32	0.12	NA	6.32733	2.80834	3.2009
A549	26754670	Fig. 5B	before irradiation	X-rays	1.15	0.72	0.26	0.09	0.03	6.00062	2.52099	2.94967
A549	26791799	Fig. 4	before irradiation	X-rays	NA	0.58	0.22	0.14	NA	6.90408	1.99903	2.83659
A549	26799321	Fig. 1A	after irradiation	γ-rays	NA	0.76	0.42	0.1	NA	6.03416	3.46807	3.31375
A549	26816539	Fig. 1	before irradiation	X-rays	NA	0.82	0.6	0.4	0.24	10.7604	4.97037	5.54898
H460	3802100	Fig. 1	after irradiation	X-rays	2	0.62	0.22	0.09	NA	5.75056	2.29108	2.75656
H460	8621255	Fig. 3B	before irradiation	γ-rays	9	0.62	0.38	0.18	0.06	7.09748	3.10343	3.57643
H460	9860291	Fig. 3A	before irradiation	γ-rays	0.45	0.52	0.22	0.07	NA	5.4197	2.13388	2.98779
H460	10644057	Fig. 3	after irradiation	γ-rays	2.38	0.76	0.14	NA	NA	NA	NA	NA
H460	10760436	Fig. 2	before irradiation	γ-rays	2.38	0.74	0.18	NA	NA	NA	NA	NA
H460	10802379	Fig. 3	before irradiation	γ-rays	2.38	0.82	0.38	0.04	NA	5.26957	3.40634	2.50853
H460	11127948	Fig. 2	before irradiation	γ-rays	1.18	0.72	0.18	0.02	NA	4.64902	2.65638	2.58851
H460	11414196	Fig. 5B	before irradiation	γ-rays	0.45	0.74	0.34	0.12	0.02	6.11782	3.25877	5.23455
H460	11567829	Fig. 2C	before irradiation	γ-rays	1	0.82	0.34	0.05	NA	5.36752	3.30418	2.72097
H460	11595687	Fig. 5A	before irradiation	γ-rays	1	0.78	0.29	0.06	NA	5.4384	3.07022	1.75733
H460	11830313	Fig. 3	before irradiation	γ-rays	1	0.52	NA	NA	NA	NA	NA	NA
H460	12438258	manuscript	before irradiation	γ-rays	1.9	0.43	NA	NA	NA	NA	NA	NA
H460	13129641	Fig. 2B	before irradiation	γ-rays	1.8	0.6	0.06	NA	NA	NA	NA	NA
H460	14751503	Fig. 3A	before irradiation	X-rays	1.8	0.32	NA	NA	NA	NA	NA	NA
H460	15087401	Fig. 6	after irradiation	γ-rays	0.84	0.78	NA	NA	NA	NA	NA	NA
H460	15110456	Fig. 3	before irradiation	γ-rays	1.8	0.6	NA	NA	NA	NA	NA	NA
H460	15258565	Fig. 3	NA	γ-rays	NA	0.8	NA	NA	NA	NA	NA	NA
H460	16093429	Fig. 2C	before irradiation	γ-rays	1.8	0.78	0.28	0.05	NA	5.29518	3.04922	2.91195
H460	16230415	Fig. 2C	before irradiation	γ-rays	10.7	0.46	0.15	0.02	NA	4.38502	2.00705	2.25504
H460	16253777	Fig. 3	before irradiation	γ-rays	1.8	0.66	0.22	0.02	NA	4.70773	2.75721	2.54333
H460	16914589	Fig. 5B	before irradiation	γ-rays	10.7	0.46	0.14	0.02	NA	4.34518	1.94174	2.20455
H460	16955736	Fig. 3	before irradiation	γ-rays	1.8	0.66	0.09	NA	NA	NA	NA	NA
H460	17143500	Fig. 3A	before irradiation	γ-rays	3.81	0.84	0.5	NA	NA	NA	NA	NA
H460	17145876	Fig. 1	before irradiation	NA	NA	0.66	0.28	0.07	NA	5.54709	2.78891	3.01535
H460	17283150	Fig. 3A	after irradiation	γ-rays	NA	NA	NA	0.02	NA	NA	NA	NA
H460	17473826	Fig. 5A	before irradiation	γ-rays	0.82	0.72	0.18	0.04	NA	4.95491	2.50274	2.70771
H460	17505006	Fig. 1B	before irradiation	γ-rays	NA	0.48	0.07	NA	NA	NA	NA	NA
H460	18089811	Suppl. Fig. 2	before irradiation	X-rays	NA	0.25	NA	NA	NA	NA	NA	NA
H460	18253126	Fig. 3A	before irradiation	γ-rays	0.82	0.6	0.2	0.04	NA	4.95231	2.39871	5.5948
H460	18414010	Fig. 1A	before irradiation	γ-rays	3.2	0.78	0.4	0.2	NA	7.3823	3.48915	3.88889
H460	18424912	Fig. 1	before irradiation	γ-rays	1.8	0.52	0.1	0.03	NA	4.33025	1.62705	2.02027
H460	18509530	Fig. 1A	before irradiation	γ-rays	1.8	0.42	0.09	0.02	NA	4.00893	1.48138	1.85827
H460	18644989	Fig. 1A	before irradiation	X-rays	NA	0.68	0.1	NA	NA	NA	NA	NA
H460	18645008	Fig. 1B	before irradiation	γ-rays	1.7	0.72	0.18	NA	NA	NA	NA	NA
H460	19014777	Fig. 3	before irradiation	X-rays	NA	0.8	0.16	0.02	NA	4.63155	2.6513	2.57316
H460	19193471	Fig. 2B	after irradiation	γ-rays	3.66	0.48	0.14	NA	0.02	NA	NA	NA
H460	19745602	Fig. 1A	before irradiation	X-rays	NA	0.6	NA	NA	NA	NA	NA	NA
H460	19773376	Fig. 3	before irradiation	γ-rays	1.8	0.4	0.18	0.03	NA	4.58358	1.8979	2.23321
H460	19826199	Fig. 4	before irradiation	X-rays	NA	0.44	NA	NA	NA	NA	NA	NA
H460	19906497	Fig. 4	before irradiation	γ-rays	1.897	0.7	0.46	0.05	NA	5.44637	3.44485	2.66676
H460	20428830	Fig. 2D	before irradiation	γ-rays	3.81	0.46	0.08	NA	NA	NA	NA	NA
H460	20731837	Fig. 1A	before irradiation	γ-rays	10.7	0.48	0.16	0.04	NA	4.74218	1.88235	2.9169
H460	21107289	Fig. 3A	before irradiation	γ-rays	1.8	0.86	0.44	0.09	NA	5.90826	3.64948	2.97418
H460	21216938	Fig. 1D	before irradiation	X-rays	2.64	0.3	0.09	0.03	NA	3.84538	1.12568	2.60555
H460	21249311	Fig. 2C	before irradiation	γ-rays	3.81	0.82	0.26	NA	NA	NA	NA	NA
H460	21251826	Fig. 4A	NA	γ-rays	NA	0.56	0.2	0.04	0.02	5.06444	1.76774	2.29896
H460	21325979	Fig. 2B	before irradiation	γ-rays	1.8	0.84	0.42	0.09	NA	5.9017	3.57408	3.04421
H460	21475852	Fig. 2C	after irradiation	γ-rays	NA	0.5	0.05	NA	NA	NA	NA	NA
H460	21737634	Fig. 2A	after irradiation	γ-rays	3.7	0.4	0.09	0.01	NA	3.86234	1.65028	2.24948
H460	21760551	Fig. 4	before irradiation	γ-rays	1.8	0.94	0.22	0.08	NA	5.60225	2.93186	3.1344
H460	21937165	Fig. 3	before irradiation	γ-rays	1	0.78	0.48	0.22	NA	7.57612	3.84034	3.30771
H460	22197230	Fig. 2D	before irradiation	γ-rays	1.8	0.66	0.26	0.02	NA	4.77534	2.9088	2.45677
H460	22246215	Fig. 5	before irradiation	γ-rays	1	0.56	0.22	NA	NA	NA	NA	NA
H460	22381900	Fig. 2A	before irradiation	γ-rays	1.3	0.4	0.12	NA	NA	NA	NA	NA
H460	22617250	Fig. 2	after irradiation	γ-rays	3.5	0.34	0.12	NA	NA	NA	NA	NA
H460	22684019	Fig. 4C	before irradiation	γ-rays	3.2	0.7	0.08	NA	NA	NA	NA	NA
H460	22755702	Fig. 6A	before irradiation	X-rays	NA	0.46	0.14	NA	NA	NA	NA	NA
H460	22795803	Fig. 2C	before irradiation	γ-rays	3.47	0.44	0.1	0.03	NA	4.22693	1.47371	3.64062
H460	23022172	Fig. 3B	before irradiation	γ-rays	3.07	0.46	0.05	NA	NA	NA	NA	NA
H460	23079779	Fig. 4	before irradiation	X-rays	NA	0.56	0.18	NA	NA	NA	NA	NA
H460	23098282	Fig. 5A	before irradiation	γ-rays	0.5	0.62	0.3	NA	NA	NA	NA	NA
H460	23254764	Fig. 2A	after irradiation	γ-rays	3.47	0.62	0.2	0.04	NA	4.96215	2.4392	3.69797
H460	23399781	Fig. 4B	before irradiation	X-rays	3.23	0.52	0.14	NA	NA	NA	NA	NA
H460	23443800	Fig. 4B	before irradiation	γ-rays	1.8	0.88	0.3	0.06	NA	5.45952	3.24461	2.88834
H460	23683497	Fig. 1B	after irradiation	γ-rays	NA	0.64	0.24	NA	NA	NA	NA	NA
H460	23891097	Fig. 2D	after irradiation	X-rays	NA	0.5	0.22	0.06	NA	5.25256	2.13922	2.53904
H460	23947765	Fig. 7D	after irradiation	γ-rays	0.7	0.38	0.07	NA	NA	NA	NA	NA
H460	24269823	Fig. 3D	before irradiation	γ-rays	0.2	0.78	NA	NA	NA	NA	NA	NA
H460	24389430	Fig. 2	before irradiation	γ-rays	NA	0.56	0.06	NA	NA	NA	NA	NA
H460	24465237	Fig. 3A	NA	γ-rays	3.2	0.24	0.06	NA	NA	NA	NA	NA
H460	24472729	Fig. 3B	before irradiation	X-rays	NA	0.72	0.5	NA	0.12	NA	NA	NA
H460	24746574	Fig. 2C	before irradiation	γ-rays	9.1	0.78	0.46	0.06	NA	5.57878	3.55663	2.70244
H460	24857596	Fig. 2B	before irradiation	X-rays	NA	0.7	0.2	NA	NA	NA	NA	NA
H460	24922006	Fig. 4A	before irradiation	γ-rays	NA	0.7	0.26	0.05	NA	5.25009	2.83942	3.02004
H460	25520882	Fig. 4B	before irradiation	γ-rays	1.8	0.72	0.4	0.15	NA	6.72902	3.29177	3.63236
H460	25599995	Fig. 2A	before irradiation	X-rays	1.14	0.92	0.66	0.32	0.1	8.0305	4.82942	4.18657
H460	25714019	Fig. 1D	after irradiation	γ-rays	3.47	0.54	0.2	0.04	NA	4.91884	2.26789	3.20539
H460	25714021	Fig. 3D	before irradiation	NA	NA	0.64	0.38	0.2	0.06	7.1643	3.24391	3.67886
H460	25755254	Fig. 1	before irradiation	X-rays	1.1	0.68	0.14	0.04	NA	4.80574	2.15233	4.18681
H460	25796091	Fig. 4B	after irradiation	X-rays	1.2	0.82	0.5	0.12	NA	6.26455	3.79143	4.29578
H460	26033480	Fig. 1A	before irradiation	γ-rays	0.81	0.78	0.4	0.12	0.02	6.19791	3.4928	4.54455
H460	26267360	Fig. 4A	after irradiation	X-rays	NA	0.68	0.24	0.05	NA	5.21176	2.70996	2.90577
H460	26280348	Fig. 1C	after irradiation	X-rays	6	0.54	0.16	0.04	NA	4.7927	2.02039	2.35487
H460	26318663	Suppl. Fig. 3	before irradiation	X-rays	NA	0.44	0.05	NA	NA	NA	NA	NA
H460	26825773	Fig. 8A	before irradiation	X-rays	1	NA	0.58	NA	0.1	NA	NA	NA
H460	26839308	Fig. 3D	before irradiation	X-rays	NA	0.7	0.28	0.07	NA	5.54982	2.86906	3.07714
H460	26901847	Fig. 1B	before irradiation	γ-rays	3.81	0.52	0.06	NA	NA	NA	NA	NA
H460	27137757	Fig. 1B	before irradiation	X-rays	NA	0.6	0.14	NA	NA	NA	NA	NA
H460	27347930	Fig. 1A	before irradiation	γ-rays	1.02	0.54	0.24	0.06	NA	5.31324	2.35293	2.91195
H460	27838149	Fig. 1D	after irradiation	γ-rays	3	0.6	0.2	0.04	NA	4.95231	2.39871	2.63055
H460	28415625	Fig. 3F	before irradiation	X-rays	0.45	0.28	0.03	NA	NA	NA	NA	NA
H460	28542649	Fig. 3B	before irradiation	X-rays	6	0.6	0.09	0.01	NA	4.066	2.01928	2.20392
H460	28697853	Fig. 1B	before irradiation	X-rays	0.57	0.64	NA	NA	0.02	NA	NA	NA
H460	28915585	Fig. 1D	before irradiation	γ-rays	1	0.58	0.26	0.08	NA	5.66218	2.46474	2.82861
H460	29070518	Fig. 1B	before irradiation	γ-rays	2.67	0.8	0.32	0.07	NA	5.59816	3.2024	3.09745
H460	29170453	Fig. 3B	before irradiation	X-rays	2	0.8	0.4	0.14	0.05	6.81614	3.32312	3.64642
HT-29	1399739	Fig. 4	before irradiation	γ-rays	6.3	0.8	0.68	0.4	0.18	9.37224	5.08355	4.93428
HT-29	1410575	Fig. 2	after irradiation	γ-rays	1.3	0.64	0.3	0.12	0.03	6.20882	2.79616	3.16327
HT-29	1991680	Fig. 1	before irradiation	γ-rays	6.3	0.7	0.32	0.12	0.04	6.44141	2.83618	3.24703
HT-29	2148170	Fig. 1	after irradiation	γ-rays	1.1	NA	NA	0.34	NA	NA	NA	NA
HT-29	6818194	Fig. 4	before irradiation	γ-rays	NA	0.76	0.36	0.14	0.02	6.22014	3.46395	3.54785
HT-29	7728750	Fig. 1	before irradiation	γ-rays	NA	0.7	0.22	0.05	0.01	5.25754	2.42002	2.70537
HT-29	8005809	Fig. 1	after irradiation	γ-rays	NA	0.84	NA	NA	NA	NA	NA	NA
HT-29	8033118	Fig. 1	after irradiation	X-rays	3.2	0.84	0.56	0.26	0.08	7.67675	4.31996	2.87612
HT-29	8205542	Fig. 4	after irradiation	γ-rays	NA	0.8	0.22	0.05	NA	5.20632	2.80881	2.98939
HT-29	8948349	Fig. 2B	before irradiation	γ-rays	1	0.76	0.44	0.09	0.02	6.09953	3.36753	3.51583
HT-29	9303056	Fig. 4	NA	γ-rays	1	0.76	NA	NA	NA	NA	NA	NA
HT-29	10473108	Fig. 1A	after irradiation	X-rays	0.6	0.66	0.03	NA	NA	NA	NA	NA
HT-29	11234886	Fig. 3	after irradiation	γ-rays	1.5	0.6	NA	NA	NA	NA	NA	NA
HT-29	11719452	Fig. 6B	before irradiation	X-rays	NA	0.58	0.26	0.09	0.02	5.75296	2.5094	2.87771
HT-29	12118542	Fig. 3	after irradiation	γ-rays	1.61	0.8	0.46	0.44	0.18	9.95952	4.48913	2.47735
HT-29	12901803	Fig. 2	after irradiation	X-rays	1	0.88	0.84	0.82	NA	NA	NA	NA
HT-29	14575700	Fig. 3	before irradiation	X-rays	0.9	0.5	0.2	0.04	NA	4.89244	2.17238	2.46903
HT-29	14676806	Fig. 1	before irradiation	X-rays	2.6	0.7	0.38	NA	NA	NA	NA	NA
HT-29	15735687	Fig. 6	after irradiation	NA	NA	0.5	0.1	0.01	NA	4.03611	1.93714	2.13912
HT-29	17674977	Fig. 8D	before irradiation	γ-rays	1.45	0.8	0.44	0.12	NA	6.26085	3.60729	2.30667
HT-29	17875720	Fig. 2C	before irradiation	γ-rays	4	0.8	0.4	0.24	NA	8.07164	3.56317	4.09884
HT-29	18006097	Fig. 1A	before irradiation	γ-rays	0.6	0.92	NA	NA	NA	NA	NA	NA
HT-29	18026198	Fig. 4A	before irradiation	X-rays	0.66	0.78	NA	NA	NA	NA	NA	NA
HT-29	18084327	Fig. 7A	before irradiation	X-rays	0.66	0.86	0.36	0.1	NA	5.97999	3.42805	3.29481
HT-29	18501589	Fig. 2	before irradiation	γ-rays	1.6	0.72	0.54	0.32	NA	9.93403	4.15734	4.86581
HT-29	19507186	Fig. 1	before irradiation	γ-rays	3.6	0.62	0.26	0.08	NA	5.6611	2.56432	1.98031
HT-29	19545790	Fig. 7B	before irradiation	γ-rays	NA	0.54	NA	NA	NA	NA	NA	NA
HT-29	19735878	Fig. 1B	after irradiation	γ-rays	3.1	0.48	0.3	0.09	NA	5.90333	2.33441	2.82222
HT-29	20011650	Fig. 1	NA	γ-rays	1.7	0.64	0.44	NA	NA	NA	NA	NA
HT-29	20024691	Fig. 1	after irradiation	γ-rays	3	0.74	0.4	0.16	NA	6.82586	3.38381	3.69053
HT-29	20227390	Fig. 2B	before irradiation	X-rays	1.83	0.54	0.24	0.03	NA	4.85464	2.55074	2.73376
HT-29	20233881	Fig. 1A	after irradiation	γ-rays	2	0.84	0.22	0.12	NA	6.14345	2.67182	3.07314
HT-29	20510198	Fig. 1B	after irradiation	γ-rays	2	0.9	0.36	0.2	NA	7.21136	3.55082	3.89172
HT-29	20633731	Fig. 1	before irradiation	γ-rays	3.6	0.74	0.36	0.1	NA	6.00992	3.23328	3.43425
HT-29	20708486	Fig. 2	after irradiation	X-rays	0.69	0.8	0.5	NA	NA	NA	NA	NA
HT-29	20732753	Fig. 3A	NA	NA	NA	NA	NA	0.3	NA	NA	NA	NA
HT-29	21267532	Fig. 4A	before irradiation	X-rays	2	0.66	0.4	0.28	0.12	8.6618	3.39519	4.13088
HT-29	21640118	Fig. 2E	before irradiation	γ-rays	1.1	0.58	0.36	0.18	0.06	7.07746	2.94121	3.47662
HT-29	21676479	Fig. 4A	after irradiation	X-rays	NA	0.52	0.2	0.02	NA	4.58645	2.42077	2.59573
HT-29	21879255	Fig. 2	before irradiation	γ-rays	1	0.7	0.32	0.17	NA	7.14457	2.88	3.45976
HT-29	22178656	Fig. 2	before irradiation	NA	NA	0.78	NA	NA	NA	NA	NA	NA
HT-29	22200761	Fig. 3B	before irradiation	γ-rays	NA	0.84	0.78	0.38	0.14	8.6304	5.19281	4.51529
HT-29	22547809	Fig. 2B	before irradiation	X-rays	2.07	0.5	0.22	0.1	0.01	5.46506	2.56853	2.84612
HT-29	22564437	Fig. 5A	before irradiation	γ-rays	3	0.46	0.06	NA	NA	NA	NA	NA
HT-29	22867891	Fig. 3B	NA	γ-rays	1	0.58	NA	NA	NA	NA	NA	NA
HT-29	22923745	Fig. 1B	before irradiation	X-rays	0.3	0.74	0.25	0.12	NA	6.2209	2.66062	3.08733
HT-29	22975619	Fig. 5C	NA	NA	NA	NA	0.18	NA	NA	NA	NA	NA
HT-29	23116821	Fig. 1	before irradiation	X-rays	1.14	0.42	0.24	0.08	NA	5.6273	1.89554	2.52616
HT-29	23403078	Fig. 1C	after irradiation	X-rays	1	0.86	0.28	0.14	NA	6.44675	3.05773	3.38489
HT-29	23540347	Fig. 1A	before irradiation	X-rays	NA	0.68	0.28	0.03	NA	4.98156	2.95903	2.6432
HT-29	23672803	Fig. 1B	before irradiation	X-rays	NA	0.74	0.66	NA	NA	NA	NA	NA
HT-29	23964692	Fig. 4A	after irradiation	γ-rays	1.953	0.88	0.74	NA	0.52	NA	NA	NA
HT-29	24359860	Fig. 3A	after irradiation	γ-rays	1.67	0.94	0.86	NA	0.76	NA	NA	NA
HT-29	24502970	Fig. 1B	before irradiation	X-rays	1	0.76	0.38	0.1	NA	6.01513	3.34069	3.44257
HT-29	24590261	Fig. 2B	before irradiation	X-rays	1	0.6	0.24	0.09	NA	5.78771	2.36258	2.80494
HT-29	24641423	Fig. 1	before irradiation	γ-rays	2.1	0.72	0.62	0.42	NA	14.2945	5.00507	6.4821
HT-29	24653797	Fig. 3B	before irradiation	γ-rays	NA	0.66	0.42	NA	0.04	NA	NA	NA
HT-29	25242034	Fig. 1	before irradiation	γ-rays	3.81	0.8	0.42	0.2	NA	7.31055	3.62119	2.68172
HT-29	25450478	Fig. 1C	after irradiation	γ-rays	2.8	0.6	0.3	0.12	NA	6.35937	2.59438	3.08842
HT-29	25497009	Fig. 2B	before irradiation	γ-rays	1	0.64	0.34	0.1	NA	6.03204	2.94134	3.21508
HT-29	25572529	Fig. 2A	before irradiation	X-rays	3	0.75	0.44	0.14	0.09	7.49903	3.11533	3.68679
HT-29	25684498	Fig. 1B	before irradiation	X-rays	NA	0.76	0.46	0.16	0.08	7.41825	3.40001	3.8397
HT-29	25825019	Fig. 1	NA	X-rays	NA	0.6	0.38	NA	NA	NA	NA	NA
HT-29	26082455	Fig. 1	before irradiation	X-rays	3	0.66	0.3	0.16	0.05	6.75981	2.81405	3.31952
HT-29	26277021	Fig. 1A	after irradiation	γ-rays	2.01	0.58	0.28	NA	NA	NA	NA	NA
HT-29	26383618	Fig. 4C	before irradiation	X-rays	4	0.76	0.48	0.22	NA	7.62747	3.79744	4.01931
HT-29	26756216	Fig. 5B	before irradiation	γ-rays	3.2	0.8	0.3	NA	NA	NA	NA	NA
HT-29	27044842	Fig. 4B	before irradiation	γ-rays	3.1	0.6	0.22	NA	NA	NA	NA	NA
SW480	8542574	Table 1	before irradiation	X-rays	NA	0.37	NA	NA	NA	NA	NA	NA
SW480	9815794	Fig. 1	before irradiation	X-rays	1.2	0.56	0.23	0.09	NA	5.77859	2.1991	2.71704
SW480	10646858	Fig. 3C	after irradiation	X-rays	1.3	0.7	0.23	NA	NA	NA	NA	NA
SW480	12654446	Fig. 1	before irradiation	X-rays	1.15	0.45	0.18	0.04	0.01	4.80433	1.80502	2.2415
SW480	14676806	Fig. 1	before irradiation	X-rays	2.6	0.66	0.3	NA	NA	NA	NA	NA
SW480	15918188	Fig. 5	before irradiation	X-rays	NA	0.66	0.36	0.18	NA	7.39467	2.97295	3.57785
SW480	15930309	Fig. 5	before irradiation	X-rays	1.15	0.55	0.19	0.05	0.01	5.06156	2.09574	2.46506
SW480	15995839	Fig. 5A	before irradiation	X-rays	1.15	0.45	0.22	0.03	0.01	4.7886	1.83309	2.25147
SW480	17167722	Fig. 1	before irradiation	γ-rays	0.97	0.62	0.42	0.18	0.06	7.12374	3.25623	3.6764
SW480	18079753	Fig. 4B	before irradiation	X-rays	6.6	NA	NA	0.62	NA	NA	NA	NA
SW480	18406888	Fig. 4A	before irradiation	X-rays	1.15	0.44	0.14	0.04	0.01	4.6073	1.60916	2.08995
SW480	18708363	Fig. 6D	NA	γ-rays	3.81	0.54	0.2	NA	NA	NA	NA	NA
SW480	19724854	Fig. 2	NA	γ-rays	0.96	0.54	0.18	0.1	0.03	5.69721	1.9415	2.56814
SW480	20338477	Fig. 1C	before irradiation	X-rays	0.7	0.7	0.52	0.26	0.08	7.70559	4.00678	4.33015
SW480	22975619	Fig. 5D	before irradiation	NA	NA	NA	0.16	NA	NA	NA	NA	NA
SW480	25242034	Fig. 1C	before irradiation	γ-rays	3.81	0.64	0.2	0.08	NA	5.55109	2.25415	3.96294
SW480	26383618	Fig. 4C	before irradiation	X-rays	4	0.7	0.38	0.24	NA	8.76042	3.15982	4.15673
SW480	27298562	Fig. 2	before irradiation	X-rays	2	0.74	0.46	0.24	0.09	7.8305	3.75531	4.17071
SW480	27650548	Fig. 8A	NA	γ-rays	NA	0.54	0.21	0.05	NA	5.09429	2.25068	2.56315
SW480	29268566	Fig. 3C	before irradiation	X-rays	1.6	0.17	NA	NA	NA	NA	NA	NA
HCT-116	1626052	Fig. 1	after irradiation	X-rays	1.65	0.3	0.05	NA	NA	NA	NA	NA
HCT-116	1626053	Fig. 1	after irradiation	X-rays	1.65	0.3	0.05	NA	NA	NA	NA	NA
HCT-116	9952296	Fig. 5	after irradiation	X-rays	4	0.4	0.05	NA	NA	NA	NA	NA
HCT-116	11064345	Fig. 3	before irradiation	X-rays	1.85	0.38	0.14	NA	NA	NA	NA	NA
HCT-116	11554850	Fig. 4	after irradiation	γ-rays	1.25	0.34	0.18	NA	NA	NA	NA	NA
HCT-116	11595687	Fig. 5B	before irradiation	γ-rays	1	0.33	0.1	0.03	NA	4.01987	1.24756	3.05916
HCT-116	11929613	Fig. 4	before irradiation	γ-rays	0.92	0.3	0.03	NA	NA	NA	NA	NA
HCT-116	12032824	Fig. 1B	before irradiation	γ-rays	0.32	0.46	0.16	NA	0.02	NA	NA	NA
HCT-116	16230415	Fig. 2D	before irradiation	γ-rays	10.7	0.36	0.04	NA	NA	NA	NA	NA
HCT-116	19275710	Fig. 2	after irradiation	γ-rays	NA	NA	0.24	NA	NA	NA	NA	NA
HCT-116	19507186	Fig. 1	before irradiation	γ-rays	3.6	0.4	0.1	0.01	NA	3.92402	1.73236	2.88773
HCT-116	19729215	Fig. 2	before irradiation	X-rays	1.3	0.58	0.44	0.14	NA	6.72724	3.13675	3.50297
HCT-116	20126977	Fig. 4C	after irradiation	X-rays	7.8	NA	NA	NA	0.12	NA	NA	NA
HCT-116	20344822	Fig. 5A	before irradiation	X-rays	1.3	0.4	0.07	0.02	NA	3.79019	1.27483	1.69617
HCT-116	23607451	Fig. 3B	before irradiation	X-rays	1.743	0.44	0.1	0.02	NA	4.11006	1.60335	1.94964
HCT-116	23889944	Fig. 1	before irradiation	γ-rays	3.6	0.5	0.18	0.04	NA	4.83204	2.05554	2.38484
HCT-116	24653797	Fig. 3B	before irradiation	γ-rays	1	0.18	0.03	NA	0.01	NA	NA	NA
HCT-116	24932238	Fig. 1C	before irradiation	γ-rays	2.6	0.56	0.18	NA	NA	NA	NA	NA
HCT-116	25497009	Fig. 5A	before irradiation	γ-rays	1	0.48	0.07	NA	NA	NA	NA	NA
HCT-116	25688502	Fig. 1A	NA	X-rays	0.2	0.22	0.04	0.01	NA	2.90909	0.861649	1.2342
HCT-116	26082455	Fig. 1	before irradiation	X-rays	3	0.4	0.06	NA	NA	NA	NA	NA
HCT-116	28879560	Fig. 2	before irradiation	X-rays	NA	0.52	0.09	0.02	NA	NA	NA	NA
DU145	1399739	Fig. 2	before irradiation	γ-rays	6.3	0.9	0.52	0.34	0.14	8.74615	4.54081	5.483
DU145	1991680	Fig. 2	before irradiation	γ-rays	6.3	0.94	0.52	0.34	0.14	8.7145	4.59569	4.97575
DU145	7916009	Fig. 3	after irradiation	γ-rays	1.61	0.48	0.14	0.04	NA	4.65289	1.7496	2.17132
DU145	8005815	Fig. 1	NA	X-rays	NA	0.36	0.14	0.04	0.01	4.49063	1.50385	2.0077
DU145	8033118	Fig. 1	after irradiation	X-rays	3.2	0.64	0.26	0.08	0.02	5.72546	2.51864	4.35294
DU145	8146333	Fig. 1	after irradiation	X-rays	0.51	0.64	0.34	NA	NA	NA	NA	NA
DU145	8420876	Fig. 1	after irradiation	X-rays	1	0.58	0.22	0.06	NA	5.28417	2.34132	2.66258
DU145	8752304	Fig. 1	before irradiation	γ-rays	1.4	0.5	0.12	0.03	NA	4.43346	1.7493	2.11245
DU145	9649298	Fig. 1B	NA	γ-rays	1	0.64	0.32	0.16	0.05	6.78005	2.87097	3.3572
DU145	9809992	Fig. 4B	after irradiation	γ-rays	1.72	NA	NA	0.36	NA	NA	NA	NA
DU145	11057744	Fig. 2	after irradiation	X-rays	NA	NA	NA	0.08	NA	NA	NA	NA
DU145	11728695	Fig. 1	after irradiation	X-rays	3	0.6	0.16	0.04	NA	4.83379	2.14749	2.44048
DU145	11896443	Fig. 7A	NA	X-rays	1.17	0.32	0.08	0.02	NA	3.73007	1.20284	1.64711
DU145	12118542	Fig. 3	after irradiation	γ-rays	1.61	0.5	0.24	0.1	NA	6.01179	2.04401	5.08831
DU145	12234989	Fig. 5B	after irradiation	γ-rays	0.78	0.44	0.14	0.04	NA	4.60705	1.65783	2.02598
DU145	12664070	Fig. 4A	before irradiation	γ-rays	1	0.56	0.2	0.02	NA	4.61279	2.49932	2.66732
DU145	14532848	Fig. 2	before irradiation	X-rays	NA	0.6	0.2	0.02	NA	4.63627	2.57123	2.67553
DU145	14729640	Fig. 2C	after irradiation	X-rays	1.55	0.74	0.38	0.14	0.05	6.7868	3.16268	3.53402
DU145	15078984	Fig. 1A	before irradiation	X-rays	1.55	0.62	0.3	0.1	0.03	6.09087	2.62612	3.03303
DU145	15546018	Fig. 1	after irradiation	X-rays	1.67	0.52	0.19	NA	NA	NA	NA	NA
DU145	15589371	Fig. 5B	after irradiation	γ-rays	NA	0.6	NA	NA	NA	NA	NA	NA
DU145	15850925	Fig. 3	after irradiation	X-rays	NA	NA	NA	0.08	NA	NA	NA	NA
DU145	15930304	Fig. 2B	after irradiation	γ-rays	0.77	0.54	0.24	0.08	NA	5.62891	2.24909	2.70049
DU145	15958643	Fig. 2B	before irradiation	X-rays	1.55	0.78	0.46	0.24	NA	7.95622	3.79465	4.22534
DU145	16984557	Fig. 3	after irradiation	γ-rays	2.21	0.36	0.12	NA	NA	NA	NA	NA
DU145	17047067	Fig. 1B	before irradiation	X-rays	1.8	0.74	0.48	0.2	NA	7.35881	3.72392	2.12786
DU145	17083915	Fig. 1	after irradiation	X-rays	2.83	0.58	0.24	0.06	NA	5.32576	2.45152	2.7404
DU145	17207548	Fig. 5D	before irradiation	X-rays	3	0.5	0.18	0.05	NA	4.98134	1.97428	2.37779
DU145	17351335	Fig. 1C	before irradiation	γ-rays	NA	0.8	0.44	0.16	0.05	6.91725	3.57853	3.85157
DU145	17876045	Fig. 1A	before irradiation	X-rays	0.89	0.9	0.5	0.2	NA	7.0836	4.06476	3.90207
DU145	18337021	Fig. 1A	before irradiation	X-rays	NA	0.68	0.36	0.2	NA	7.79686	3.01146	2.20619
DU145	18413812	Fig. 2C	before irradiation	γ-rays	0.9	0.76	0.34	0.16	0.04	6.65165	3.25172	2.99789
DU145	18470750	Fig. 3	after irradiation	X-rays	2.08	0.3	0.1	NA	NA	NA	NA	NA
DU145	18501589	Fig. 2	before irradiation	γ-rays	1.6	0.84	0.56	0.28	NA	8.17318	4.3627	4.69946
DU145	18729192	Fig. 4A	after irradiation	X-rays	1.6	0.76	0.3	0.09	0.02	5.92636	2.92465	3.18213
DU145	18799330	Fig. 1	NA	γ-rays	1.953	0.7	0.44	0.24	0.12	8.46014	3.47484	4.13298
DU145	18821526	Fig. 1B	after irradiation	X-rays	1.8	0.34	0.24	0.08	0.04	5.61899	1.64044	2.33772
DU145	19047096	Fig. 1C	before irradiation	X-rays	NA	0.74	0.36	0.16	0.06	7.02208	3.12128	3.56769
DU145	19366835	Fig. 1C	before irradiation	X-rays	1.55	0.7	0.3	0.1	0.03	6.13164	2.74586	4.19042
DU145	19902473	Fig. 2	after irradiation	γ-rays	1	0.64	0.4	0.2	0.09	7.76354	3.12127	3.75677
DU145	20159364	Fig. 3	after irradiation	X-rays	0.69	0.8	0.74	NA	NA	NA	NA	NA
DU145	20164535	Fig. 4B	before irradiation	X-rays	NA	0.74	0.46	NA	NA	NA	NA	NA
DU145	21095075	Fig. 3	after irradiation	X-rays	0.69	0.72	0.46	0.28	NA	9.28388	3.6875	4.44316
DU145	21176082	Fig. 4A	after irradiation	γ-rays	0.51	0.78	0.48	NA	NA	NA	NA	NA
DU145	21222513	Fig. 4B	before irradiation	γ-rays	1.8	0.7	0.58	0.34	NA	10.5573	4.34043	5.10251
DU145	21277116	Fig. 3B	before irradiation	X-rays	NA	0.6	NA	NA	NA	NA	NA	NA
DU145	21514073	Fig. 3B	before irradiation	γ-rays	1.8	0.9	0.64	0.44	NA	10.5511	5.40627	5.86168
DU145	21571912	Fig. 2B	before irradiation	NA	NA	0.56	0.44	0.3	NA	NA	2.89322	3.65446
DU145	21784649	Fig. 4	after irradiation	γ-rays	2.1	0.7	0.32	0.14	0.04	6.53384	2.96456	3.34765
DU145	21816290	Fig. 3B	before irradiation	X-rays	NA	0.7	0.3	0.1	NA	5.98114	2.89494	3.1728
DU145	22096086	Fig. 1C	after irradiation	X-rays	2.8	0.96	0.84	NA	0.52	NA	NA	NA
DU145	22130126	Fig. 1B	before irradiation	X-rays	3.25	NA	0.22	NA	NA	NA	NA	NA
DU145	22546687	Fig. 2B	before irradiation	X-rays	NA	0.74	0.48	NA	0.09	NA	NA	NA
DU145	22768044	Fig. 3A	before irradiation	X-rays	3.5	0.76	0.42	0.16	NA	6.79205	3.50557	3.77261
DU145	22827214	Fig. 1	after irradiation	NA	NA	0.6	0.28	0.14	0.06	6.80443	2.40777	3.11359
DU145	22967802	Fig. 3A	after irradiation	γ-rays	NA	0.7	0.3	0.08	NA	5.70745	2.93575	3.15213
DU145	23022765	Fig. 3	before irradiation	X-rays	NA	0.7	0.4	NA	0.1	NA	NA	NA
DU145	23026049	Fig. 1C	after irradiation	X-rays	4	0.74	0.36	0.1	0.03	6.23729	3.03079	3.31965
DU145	23098282	Fig. 1A	before irradiation	γ-rays	0.5	0.56	0.34	0.18	0.08	7.48605	2.65222	3.42407
DU145	23321494	Fig. 3A	before irradiation	X-rays	1.3	0.6	0.22	0.07	NA	5.43857	2.33553	2.69713
DU145	23399781	Fig. 4	before irradiation	X-rays	NA	0.74	0.42	NA	0.06	NA	NA	NA
DU145	23545587	Fig. 3	after irradiation	X-rays	3	0.7	0.38	0.16	0.02	6.28237	3.55156	3.51835
DU145	24121106	Fig. 1A	before irradiation	γ-rays	2.5	0.84	0.34	0.12	0.05	6.67622	3.01017	3.41166
DU145	24472729	Fig. 3A	before irradiation	X-rays	NA	0.54	0.22	NA	0.02	NA	NA	NA
DU145	24475739	Fig. 4B	after irradiation	X-rays	NA	0.54	0.12	0.08	NA	5.18877	1.4799	2.0917
DU145	25111005	Fig. 2D	before irradiation	γ-rays	0.8	0.86	0.68	0.34	0.09	7.92971	4.85189	4.03795
DU145	25307178	Fig. 1D	before irradiation	γ-rays	NA	0.54	0.18	0.07	0.02	5.32321	1.92482	2.44952
DU145	25781902	Fig. 3	after irradiation	X-rays	NA	0.86	0.7	0.52	0.09	8.09144	5.26141	3.79602
DU145	25873625	Fig. 5E	before irradiation	γ-rays	0.8	0.5	0.26	0.08	0.05	6.05039	1.88457	2.64885
DU145	25893276	Fig. 3A	after irradiation	X-rays	NA	0.84	0.52	NA	0.15	NA	NA	NA
DU145	25973952	Fig. 2A	before irradiation	X-rays	0.57	0.76	0.44	NA	0.12	NA	NA	NA
DU145	26560194	Fig. 6B	after irradiation	γ-rays	0.86	0.66	0.42	0.28	0.14	9.16237	3.40668	4.25238
DU145	26722033	Fig. 1B	after irradiation	γ-rays	0.86	0.7	0.4	0.26	0.14	9.09603	3.30546	4.1804
DU145	26990493	Fig. 2G	before irradiation	X-rays	5	0.82	0.44	0.14	0.03	6.50927	3.6486	3.6847
DU145	27599042	Fig. 2A	before irradiation	NA	NA	0.8	NA	NA	NA	NA	NA	NA
DU145	27634756	Fig. 4	before irradiation	NA	NA	0.72	0.32	0.14	NA	6.57079	2.97537	3.36362
DU145	27713179	Fig. 2B	before irradiation	X-rays	NA	0.58	0.18	0.08	NA	5.48959	1.98196	2.52584
DU145	27902466	Fig. 1A	before irradiation	NA	NA	0.3	0.07	0.01	NA	3.52763	1.26157	1.61517
DU145	28208838	Fig. 2A	before irradiation	X-rays	NA	0.58	0.26	0.11	NA	6.17118	2.34788	2.90524
DU145	28638277	Fig. 7E	before irradiation	X-rays	NA	0.6	0.28	0.09	0.03	5.9747	2.43616	2.8962
DU145	29101735	Fig. 1A	NA	X-rays	0.28	NA	0.72	NA	NA	NA	NA	NA
PC-3	8420876	Fig. 1	after irradiation	X-rays	1	0.32	0.07	NA	NA	NA	NA	NA
PC-3	9033638	Fig. 7	after irradiation	X-rays	1.72	NA	NA	0.3	NA	NA	NA	NA
PC-3	9649298	Fig. 1B	before irradiation	γ-rays	1	0.71	0.36	0.12	0.03	6.32324	3.13433	3.40924
PC-3	9809992	Fig. 4A	after irradiation	γ-rays	1.72	NA	NA	0.22	NA	NA	NA	NA
PC-3	10389766	Fig. 3A	NA	X-rays	1.16	0.78	0.38	0.18	0.02	6.35776	3.73268	3.39984
PC-3	10615240	Table 2	before irradiation	X-rays	NA	0.59	NA	NA	NA	NA	NA	NA
PC-3	11059687	Fig. 6A	before irradiation	γ-rays	9.1	0.6	0.18	NA	NA	NA	NA	NA
PC-3	11720844	Fig. 1	before irradiation	X-rays	0.6	0.4	NA	NA	NA	NA	NA	NA
PC-3	12118542	Fig. 3	after irradiation	γ-rays	1.61	0.54	0.18	0.03	NA	4.71102	2.24245	2.70886
PC-3	12169388	Fig. 1	after irradiation	γ-rays	3.7	0.72	0.28	0.08	NA	5.68415	2.88289	3.10812
PC-3	12234989	Fig. 5A	after irradiation	γ-rays	0.78	0.44	0.12	0.03	NA	4.36198	1.62134	2.11289
PC-3	12664070	Fig. 4	before irradiation	γ-rays	1	0.32	0.05	NA	NA	NA	NA	NA
PC-3	14985701	Fig. 4B	before irradiation	X-rays	2.64	0.64	0.22	0.09	NA	5.74794	2.33914	2.78138
PC-3	15042313	Table 3	NA	X-rays	2.64	0.63	NA	NA	NA	NA	NA	NA
PC-3	15625575	Fig. 2A	before irradiation	X-rays	2	0.72	0.42	0.2	NA	7.49864	3.43294	3.88018
PC-3	15713891	Fig. 1A	before irradiation	X-rays	3	0.44	0.14	0.05	NA	4.74757	1.57858	2.11866
PC-3	15930304	Fig. 2A	after irradiation	γ-rays	0.77	0.58	0.3	0.06	0.02	5.60872	2.40025	2.77781
PC-3	16001975	Fig. 2	after irradiation	γ-rays	5.8	0.38	0.14	0.03	NA	4.38675	1.61127	2.02773
PC-3	17047067	Fig. 1B	before irradiation	γ-rays	1.8	0.48	0.12	0.02	NA	4.27443	1.84348	4.04739
PC-3	17207548	Fig. 5A	NA	X-rays	3	0.26	0.04	NA	NA	NA	NA	NA
PC-3	17674977	Fig. 8F	before irradiation	γ-rays	1.45	0.44	0.18	0.03	NA	4.62719	2.0053	3.42621
PC-3	17718927	Fig. 8	before irradiation	X-rays	NA	0.7	0.1	NA	NA	NA	NA	NA
PC-3	18337021	Fig. 2B	before irradiation	X-rays	NA	0.4	0.14	0.01	NA	4.10972	2.01218	3.7018
PC-3	18413812	Fig. 2C	before irradiation	γ-rays	0.9	0.62	0.28	0.07	0.01	5.50299	2.77518	3.56092
PC-3	18625043	Fig. 5	before irradiation	X-rays	2.4	0.44	0.28	NA	NA	NA	NA	NA
PC-3	19240717	Fig. 2B	after irradiation	X-rays	NA	0.8	0.62	NA	0.06	NA	NA	NA
PC-3	19545787	Fig. 1C	after irradiation	X-rays	NA	0.58	0.38	0.09	0.03	6.132	2.77364	3.13035
PC-3	20544341	Fig. 6A	after irradiation	X-rays	NA	0.68	0.26	0.09	NA	5.80222	2.66893	2.98586
PC-3	20888325	Fig. 2A	after irradiation	X-rays	0.53	0.44	0.12	0.03	NA	4.36198	1.62134	2.02598
PC-3	21176082	Fig. 4A	after irradiation	γ-rays	0.51	0.38	0.22	NA	NA	NA	NA	NA
PC-3	21571912	Fig. 2B	NA	NA	NA	0.74	0.36	0.18	NA	7.18464	3.19586	3.65446
PC-3	21804946	Fig. 3A	after irradiation	X-rays	NA	0.26	0.07	NA	NA	NA	NA	NA
PC-3	21932424	Fig. 2	after irradiation	X-rays	NA	0.36	0.12	0.02	NA	4.11427	1.56738	1.93137
PC-3	21953074	Fig. 1C	before irradiation	X-rays	2.7	0.46	0.12	0.02	NA	4.25242	1.80064	2.09703
PC-3	22363680	Fig. 1D	after irradiation	X-rays	5	0.56	0.26	0.07	NA	5.50726	2.45728	2.7858
PC-3	22525512	Fig. 6	after irradiation	γ-rays	NA	0.74	0.16	NA	NA	NA	NA	NA
PC-3	22802963	Fig. 1D	after irradiation	X-rays	5	0.76	0.52	0.34	NA	10.3626	4.24099	5.0028
PC-3	22805327	Fig. 2B	NA	X-rays	1.74	0.74	0.5	0.22	NA	7.64751	3.82598	4.18166
PC-3	23523613	Fig. 1C	before irradiation	γ-rays	0.85	0.52	NA	NA	NA	NA	NA	NA
PC-3	23594417	Fig. 3	after irradiation	X-rays	NA	0.54	0.22	NA	NA	NA	NA	NA
PC-3	23991216	Fig. 1B	before irradiation	X-rays	2.7	0.5	0.14	0.02	NA	4.38436	2.02956	2.26979
PC-3	25369795	Fig. 1	before irradiation	X-rays	NA	0.74	0.2	NA	NA	NA	NA	NA
PC-3	26385392	Fig. 3A	before irradiation	γ-rays	0.8	0.76	0.3	0.09	0.01	5.71575	3.1788	3.26834
PC-3	27599042	Fig. 2B	before irradiation	X-rays	1	0.48	NA	NA	NA	NA	NA	NA
PC-3	28782644	Fig. 4	after irradiation	X-rays	0.62	0.32	0.07	0.01	NA	3.56988	1.30492	1.6488
PC-3	29038517	Fig. 1	before irradiation	X-rays	NA	0.54	0.22	NA	0.01	NA	NA	NA
PC-3	29657993	Fig. 1B	before irradiation	X-rays	1.3	0.28	0.05	NA	NA	NA	NA	NA

## Sheet: SD2
Supplementary Data 2: Cell line name used for the literature search.
Primary name	Aliases
22Rv1
A549
ABC-1
C2BBe1	Caco-2/BBe1; Caco-2/Bbe; Caco-2BBe
CAL-12T	CAL12T
Calu-1	Calu1
Calu-3	Calu3
Calu-6	Calu6
CCK-81	CCK81
ChaGo-K-1	ChaGoK1
CL-11	CL11
CL-14	CL14
CL-34	CL34
CL-40	CL40
COLO 201	Colo-201; COLO201
COLO 205	Colo-205; COLO205
COLO 668	COLO-668; COLO668
COLO-320	COLO320; COLO-320-HSR; COLO320HSR
COLO-678	COLO 678; COLO678
COLO-699	COLO 699; COLO-699N
COR-L105	CORL105
COR-L23	CORL23
COR-L24	CORL24
COR-L279	CORL279
COR-L311	CORL311
COR-L47	CORL47
COR-L51	CORL51
COR-L88	CORL88
COR-L95	CORL95
CPC-N
CW-2	CW2
DFCI024
DLD-1
DMS 114	DMS-114; DMS114
DMS 153	DMS-153; DMS153
DMS 273	DMS-273; DMS273
DMS 454	DMS-454; DMS454
DMS 53	DMS-53; DMS53
DMS 79	DMS-79; DMS79
DU 145	DU-145; DU145
DV-90
EBC-1	EBC1
EPLC-272H
GP2d
HCC-1171	HCC1171
HCC-1195	HCC1195
HCC-1359	HCC1359
HCC-1438	HCC1438
HCC-15	HCC15
HCC-1588	HCC-1588
HCC-1833	HCC1833
HCC-1897	HCC1897
HCC-2108	HCC2108
HCC-2279	HCC2279
HCC-2814	HCC2814
HCC-33	HCC33
HCC-366	HCC366
HCC-44	HCC44
HCC-56	HCC56
HCC-78	HCC78
HCC-827-GR5	HCC827GRS
HCC-95	HCC95
HCC2935	HCC-2935
HCC364	HCC-364
HCC4006	HCC-4006
HCC827	HCC-827
HCT 116	HCT-116
HCT-15	HCT 15
HCT-8	HCT 8
HLC-1	HLC1
HLF-a
HRT-18	HRT18
Hs 229.T
Hs 255.T
Hs 618.T
Hs 675.T
Hs 698.T	HS698.T
HT-29
HT115	HT-115
HT55	HT-55
IA-LM
KM12	KM-12; KM.12
KNS-62	KNS62
LC-1/sq-SF	LC-1 sq
LC-1F	LC1F
LCLC-103H	LCLC103H
LCLC-97TM1
LK-2	LK2
LNCaP clone FGC	LNCap.FGC
LOU-NH91	LOU-NH-91; LOUNH91
LoVo
LS 180	LS-180; LS180
LS1034	LS-1034
LS123	LS-123
LS411N	LS-411N
LS513
LU65	Lu-65
LU99	LU99A
LUDLU-1	LUDLU1
LXF-289	LXF289
MDA PCa 2b
MDST8
MOR/CPR
NCI-H1048	H1048
NCI-H1092	H1092
NCI-H1105	H1105
NCI-H1155	H1155
NCI-H1184	H1184 | H-1184
NCI-H1299	H1299
NCI-H1339	H-1339 | H1339
NCI-H1341	H1341
NCI-H1355	H1355
NCI-H1373	H1373
NCI-H1385	H1385
NCI-H1395	H1395
NCI-H1435	H1435
NCI-H1436	H1436
NCI-H1437	H1437
NCI-H146	H146
NCI-H1563	H1563
NCI-H1568	H1568
NCI-H1573	H1573
NCI-H1581	H1581
NCI-H1618	H1618
NCI-H1623	H1623
NCI-H1648	H1648
NCI-H1650	H1650
NCI-H1651	H1651
NCI-H1666	H1666
NCI-H1693	H1693
NCI-H1694	H1694
NCI-H1703	H1703
NCI-H1734	H1734
NCI-H1755	H1755
NCI-H1781	H1781
NCI-H1792	H1792
NCI-H1793	H1793
NCI-H1836	H1836
NCI-H1838	H1838
NCI-H1869	H1869
NCI-H1876	H1876
NCI-H1915	H1915
NCI-H1930	H1930
NCI-H1944	H1944
NCI-H196	H196
NCI-H1963	H-1963 | H1963
NCI-H1975	H1975
NCI-H2009	H2009
NCI-H2023	H2023
NCI-H2029	H2029
NCI-H2030	H2030
NCI-H2066	H2066
NCI-H2073	H2073
NCI-H2081	H2081
NCI-H2085	H2085
NCI-H2087	H2087
NCI-H209	H-209 | H209
NCI-H2106	H2106
NCI-H211	H211
NCI-H2110	H2110
NCI-H2122	H2122
NCI-H2126	H2126
NCI-H2141	H2141
NCI-H2170	H2170
NCI-H2171	H2171 | H-2171
NCI-H2172	H2172
NCI-H2196	H2196
NCI-H2227	H2227
NCI-H2228	H2228
NCI-H226	H226
NCI-H2286	H2286
NCI-H2291	H2291
NCI-H23	H23
NCI-H2342	H2342
NCI-H2347	H2347
NCI-H2405	H2405
NCI-H2444	H2444
NCI-H292	H292 | H292
NCI-H322	H322 | NCI-H322M
NCI-H3255	H3255
NCI-H358	H358
NCI-H441	H441
NCI-H446	H446
NCI-H460	H460
NCI-H508	H508
NCI-H510	H510A | H510 | NCI-H510A
NCI-H520	H520
NCI-H522	H522
NCI-H524	H524
NCI-H526	H526
NCI-H596	H596
NCI-H647	H647
NCI-H650	H650
NCI-H660	H660
NCI-H661	H661
NCI-H69	H69
NCI-H716	H716
NCI-H727	H727
NCI-H747	H747
NCI-H810	H810
NCI-H82	H82
NCI-H838	H838
NCI-H841	H841
NCI-H854	H854
NCI-H889	H889
OUMS-23
PC-14
PC-3
PrEC LH	PrEC-LH
RCM-1
RERF-LC-Ad1
RERF-LC-Ad2
RERF-LC-AI
RERF-LC-KJ
RERF-LC-MS
RERF-LC-Sq1
RKO
SALE
SBC-5
SCLC-21H
SHP-77
SK-CO-1
SK-LU-1
SK-MES-1
SNU-1033	NCI-SNU-1033
SNU-1040	NCI-SNU-1040
SNU-1197	NCI-SNU-1197
SNU-175	NCI-SNU-175
SNU-283	NCI-SNU-283
SNU-407	NCI-SNU-407
SNU-503	NCI-SNU-503
SNU-61	NCI-SNU-61
SNU-81	NCI-SNU-81
SNU-C1	SNUC1, NCI-SNU-C1
SNU-C2A	NCI-SNU-C2A
SNU-C4	SNUC4
SNU-C5	SNUC5
Sq-1	SQ1
SW 1271	SW1271, SW-1271
SW 1573	SW-1573, SW1573
SW 900
SW1116	SW 1116, SW-1116
SW1417	SW-1417, SW 1417
SW1463	SW-1463, SW 1463
SW403
SW48
SW480
SW620
SW837
SW948
T3M-10
T84
TIG-3 TD	TIG3 TD
VCaP
VMRC-LCD	LCD
VMRC-LCP	Patton
